1 **Local light signalling at the leaf tip drives remote differential petiole growth through auxin-**  
2 **gibberellin dynamics**

3 Jesse J. Küpers<sup>1</sup>, Basten L. Snoek<sup>2,§</sup>, Lisa Oskam<sup>1,§</sup>, Chrysoula K. Pantazopoulou<sup>1,§</sup>, Sanne E. A. Matton<sup>1</sup>, Emilie  
4 Reinen<sup>1,#</sup>, Che-Yang Liao<sup>1,3</sup>, Eline D.C. Eggermont<sup>1</sup>, Harold Weekamp<sup>1</sup>, Wouter Kohlen<sup>4</sup>, Dolf Weijers<sup>3</sup> and  
5 Ronald Pierik<sup>1,5,\*</sup>

6 <sup>1</sup> Plant Ecophysiology, dept. Biology, Utrecht University, Padualaan 8, 3584 CH Utrecht, the  
7 Netherlands

8 <sup>2</sup> Theoretical Biology and Bioinformatics, dept. Biology, Utrecht University, Padualaan 8, 3584 CH  
9 Utrecht, the Netherlands

10 <sup>3</sup> Laboratory of Biochemistry, Wageningen University, Stippeneng 4, 6708 WE Wageningen, The  
11 Netherlands

12 <sup>4</sup> Laboratory for Molecular Biology, Wageningen University, Droevendaalsesteeg 1, 6708 PB  
13 Wageningen, Netherlands

14 <sup>5</sup> Lead Contact

15 # present address: Gadeta B.V., Yalelaan 62, 3584 CM Utrecht, the Netherlands

16 <sup>§</sup> These authors contributed equally to this manuscript.

17 \* Author for correspondence: [r.pierik@uu.nl](mailto:r.pierik@uu.nl)

18

19

## 20 **Summary**

21 Although plants are immobile, many of their organs are flexible to move in response to  
22 environmental cues. In dense vegetation plants detect neighbours through far-red light perception  
23 with their leaf tip. They respond remotely, with asymmetrical growth between the abaxial and  
24 adaxial sides of the leafstalk, the petiole. This results in upward movement that brings the leaf blades  
25 into better lit zones of the canopy. The plant hormone auxin is required for this response, but it is not  
26 understood how non-differential leaf tip-derived auxin can remotely regulate movement. Here we  
27 show that remote light signalling promotes auxin accumulation in the abaxial petiole by reinforcing  
28 an intrinsic auxin transport directionality. In the petiole, auxin elicits a response of both auxin as well  
29 as a second growth promoter; gibberellin. We show that this dual regulation is necessary for  
30 hyponastic leaf movement in response to light. Our results reveal how plants can spatially relay  
31 information about neighbour proximity from their sensory leaf tips to the petiole base, thus driving  
32 adaptive growth.

33

## 34 **Introduction**

35 In dense vegetation, plants adapt their growth to actively compete for light with their neighbours.  
36 However, light distribution in vegetation is very heterogeneous and different plant parts will  
37 therefore receive different light intensities and density cues<sup>1</sup>. Plants use intricate mechanisms of  
38 signal transfer between plant parts in order to respond adequately to this heterogeneous  
39 information<sup>2-4</sup>, but these mechanisms are still poorly understood. In *Arabidopsis*, adaptive shade  
40 avoidance responses to neighbours include hypocotyl elongation in seedlings and petiole elongation  
41 and upward leaf movement (hyponasty) in adult plants<sup>5</sup>. Although adaptive for the individual plant,  
42 shade avoidance responses reduce productivity of dense monocultures<sup>1,6,7</sup>. To accurately evaluate  
43 the competitive threat in their environment, plants use phytochrome (phy) photoreceptors to  
44 monitor the ratio of red (R) to far-red (FR) light (R/FR)<sup>8</sup>. In shade, the R/FR is low due to specific

45 absorption of R light by leaves to power photosynthesis. But even before actual shading occurs,  
46 reflected FR-enriched light from neighbouring leaves will reduce the R/FR and provide an early  
47 neighbour proximity signal that precedes light competition<sup>9</sup>. FR-enriched light will induce a tissue-  
48 specific growth response in *Arabidopsis* leaves depending on the site of perception<sup>10,11</sup>. FR-  
49 enrichment at the petiole locally stimulates petiole elongation while FR-enrichment at the leaf tip  
50 (FRtip) results in petiole hyponasty. The spatial separation between FR-induced petiole elongation  
51 and hyponasty allows the plant to adjust its growth to optimally respond to either self-shading or  
52 neighbour competition<sup>11</sup>. In FRtip-induced petiole hyponasty there is spatial separation between the  
53 leaf tip as the sensory organ and the petiole base as responding organ<sup>10,11</sup>. Moreover, petiole  
54 hyponasty typically requires differential growth rates between the abaxial (bottom) and adaxial (top)  
55 sides of the petiole<sup>12</sup>. This growth response thus provides a study system to unravel how remote  
56 light signalling regulates distal and differential growth without local light signalling in the tissue  
57 displaying the growth response. We previously established that petiole hyponasty in response to  
58 FRtip occurs via local inactivation of phyB in the leaf tip, which typically results in activation of the  
59 PHYTOCHROME INTERACTING FACTOR (PIF) bHLH transcription factors<sup>10,11</sup>. Active PIFs then enhance  
60 expression of *YUCCA* (*YUC*) genes that encode the YUC enzymes required for auxin biosynthesis<sup>13-15</sup>.  
61 The auxin that is produced in the leaf tip subsequently stimulates petiole hyponasty. This regulatory  
62 network also seems to drive seedling hypocotyl elongation responses upon detection of FR  
63 enrichment in the cotyledons<sup>16,17</sup>.

64 So far, it remained unclear how the auxin signal that comes from the remote leaf tip directs  
65 differential growth and petiole hyponasty. Using tissue-specific time-series RNA-sequencing, we  
66 show that neighbour detection in the leaf tip results in unique transcript profiles in the leaf tip as  
67 well as the abaxial and adaxial petiole. Leaf tip-derived auxin is specifically transported towards the  
68 abaxial petiole to locally enhance gene expression and ultimately cell elongation. Besides auxin, we  
69 identify roles for gibberellin (GA) and PIFs in the responding petiole and suggest side-specific  
70 activation of the growth-promoting BRASSINAZOLE RESISTANT 1 (BZR1) - AUXIN RESPONSE FACTOR 6

71 (ARF6) - PIF4 / DELLA (BAP/D) transcription factor module. This study reveals how plants use targeted  
72 long-distance auxin signalling to adapt their growth to competitive environments.

73

## 74 **Results**

### 75 **Characterizing the kinetics and localisation of leaf tip FR light-induced hyponasty and gene** 76 **expression**

77 Neighbour detection through FR light in the distal leaf tip (FRtip) leads to petiole hyponasty which  
78 first becomes visible ~4 hours after start of treatment (Figures 1A and S1A, Video S1). We measured  
79 epidermal cell length in the petiole and found that FRtip specifically enhances epidermal cell  
80 elongation in the proximal two-thirds of the abaxial petiole (Figure 1B). Considering the previously  
81 identified important role of auxin in FRtip induced petiole hyponasty we studied the expression of  
82 auxin response genes in the petiole upon FRtip. Indeed, the auxin-responsive transcripts of *IAA29*  
83 and *ACS4* were induced in the proximal petiole within 100 minutes of FRtip while the shade marker  
84 transcript *PIL1* was unaffected in the non-FR-exposed petiole (Figure S1B). In order to get more  
85 insight in the spatial regulation of differential gene expression and petiole growth by FR signalling in  
86 the leaf tip, we decided to separately harvest the leaf tip and the separated abaxial and adaxial sides  
87 of the proximal two-thirds of the petiole in white light (WL) and FRtip (Figure 1C). To capture the  
88 early transcriptional response, we harvested at twenty-minute intervals ranging from 60 minutes (40  
89 minutes for the leaf tip) to 180 minutes of treatment as well as at a 300 minute timepoint (Figure  
90 1D).

### 91 **Neighbour detection at the leaf tip induces local and remote, tissue-specific transcriptome changes**

92 Reads were annotated to the TAIR10 genome and DESeq2-normalised read counts<sup>18</sup> were used to  
93 perform principal coordinate analysis (PCoA). We found clear PCoA separation between samples for  
94 timepoint and tissue type (Figure S1C). PCoA per tissue and differentially expressed gene (DEG)



95 analysis per timepoint per tissue showed strong and consistent treatment effects in the leaf tip while  
 96 in the petiole the treatment effect only became apparent at later timepoints (Figures 1E and S1D),  
 97 consistent with our initial gene expression analyses (Figure S1B).

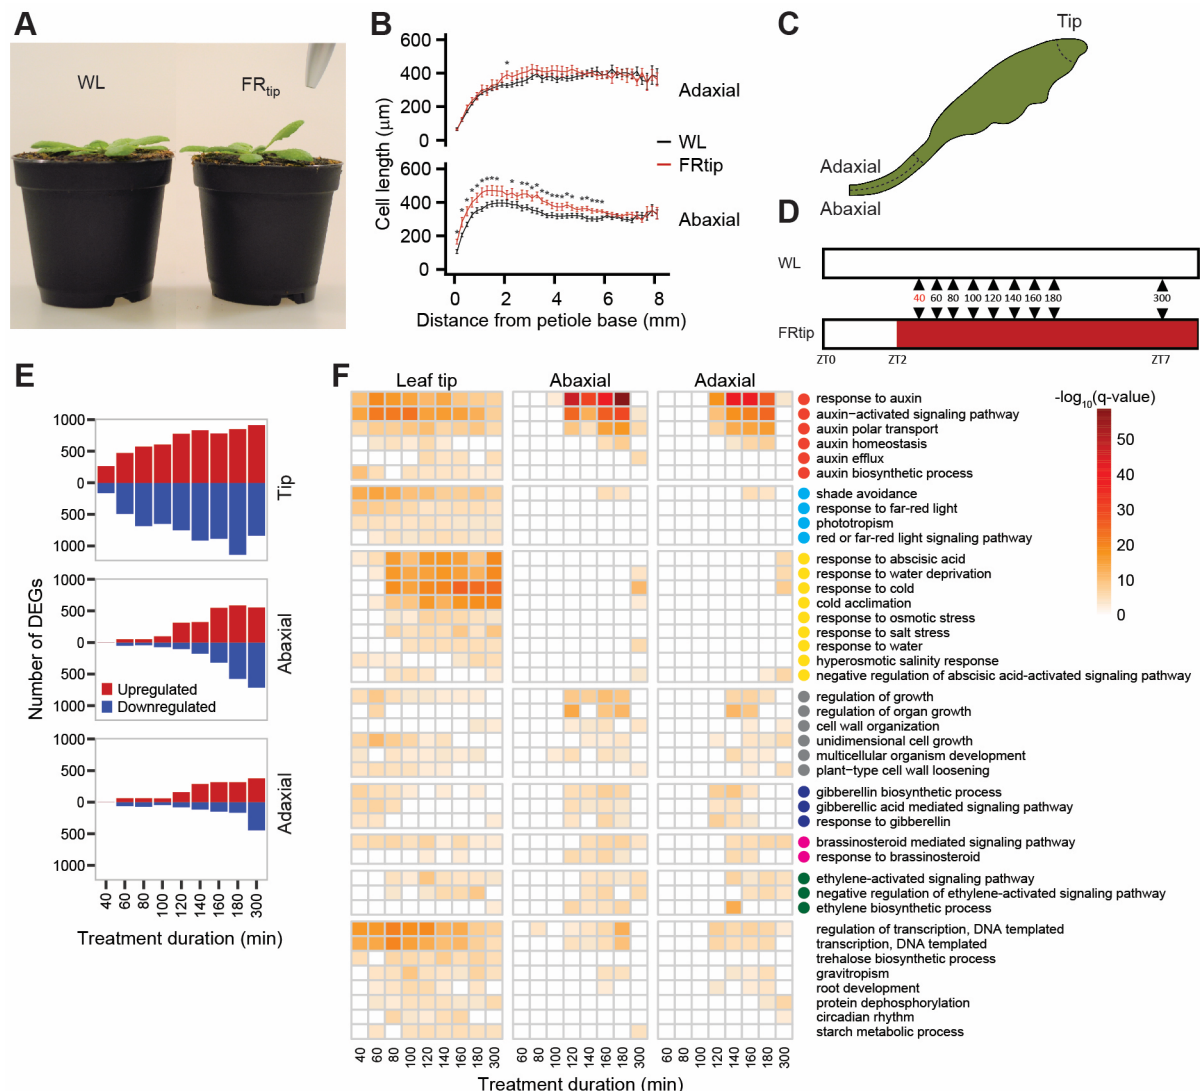

98  
 99 **Figure 1. Neighbour detection in the leaf tip induces petiole hyponasty and transcriptional reprogramming in the petiole**  
 100 (A) Adult Col-0 phenotype after 24h in the indicated light treatments. (B) Epidermal cell length measured along the abaxial and adaxial  
 101 petiole after 24h in the indicated light treatments (n = 12 - WL, 15 - FR<sub>tip</sub>, \*: p < 0.05, two-sided t-test, data represent mean ± SEM). (C & D)  
 102 Schematic representations of harvested material (C, dotted lines identify the harvested sections in leaf tip and petiole base) and harvest  
 103 timepoints (D) for RNA-sequencing. At the 40 min. timepoint, only leaf tip material was analysed. (E) Number of differentially expressed  
 104 genes (DEGs) in FR<sub>tip</sub> compared to WL, calculated per timepoint and per tissue. DEGs were called when p < 0.01 and log<sub>2</sub>FC > 0.3  
 105 (upregulated; red) or log<sub>2</sub>FC < -0.3 (downregulated; blue). (F) Heatmap showing -log<sub>10</sub>(q-value) of gene ontology (GO) terms identified per  
 106 timepoint and per tissue based on upregulated DEGs defined in (E). Coloured circles represent the following defined major biological  
 107 processes; red – auxin distribution and signalling; cyan – light signalling; yellow – abscisic acid signalling; grey – cell and organ growth; blue  
 108 – gibberellin biosynthesis and signalling; magenta – brassinosteroid signalling; green – ethylene biosynthesis and signalling. See also Figures  
 109 S1 and S2, Video S1.

110

111 **Neighbour detection at the leaf tip induces tissue specific hormone response and biosynthesis**

112 Gene ontology (GO) analysis for biological processes on upregulated DEGs per tissue per timepoint  
113 revealed early enrichment of auxin and light quality-related GO terms in the leaf tip followed by later  
114 enrichment of abscisic acid (ABA)-related GO terms (Figure 1F). As expected, light quality-related GO  
115 terms were largely absent from the petiole. In the petiole, we did, however, find enrichment of auxin  
116 response terms from 100 to 180 minutes, that dampened towards 300 minutes. This temporal GO  
117 enrichment pattern was similar for growth, response to brassinosteroid (BR) and ethylene as well as  
118 gibberellin biosynthesis and response (Figure 1F). Similar to the leaf tip, there was late enrichment of  
119 ABA-related GO terms in the petiole after the auxin response GO terms had passed peak significance.  
120 The apparent overrepresentation of auxin signalling in all tissues was confirmed when we analysed  
121 expression of all genes that make up the GO category GO:0009733 “response to auxin” (Figure S2A).  
122 The analysis of these individual genes revealed shared, but also time and tissue-specific expression of  
123 many auxin-responsive genes. For example, regarding *SMALL AUXIN UPREGULATED (SAUR)*  
124 transcripts, *SAUR19-24* were induced in all tissues, while *SAUR25-29* and *SAUR62-68* were  
125 predominantly induced in the petiole (Figure S2A).

126 As we found GO enrichment for several hormone-related processes, we investigated expression of  
127 hormone biosynthesis genes (Figure S2B). Regarding the main auxin biosynthesis pathway,  
128 expression of *TRYPTOPHAN AMINOTRANSFERASE OF ARABIDOPSIS 1 (TAA1)* and *YUCCA 6 (YUC6)* was  
129 repressed in the leaf tip while *YUC2*, *YUC5*, *YUC8* and *YUC9* expression was induced. In contrast, *YUC3*  
130 transcription was specifically induced in the petiole. Investigating gibberellin biosynthesis we found  
131 tissue-specific induction of *GA20 OXIDASE 1 (GA20OX1)* and *GA20OX2* in the petiole and *GA20OX3* in  
132 the leaf tip. One step downstream of GA20OX proteins in the gibberellin biosynthesis pathway, *GA3*  
133 *OXIDASE 1 (GA3OX1)* was induced in both the leaf tip and the petiole. Regarding ABA biosynthesis,  
134 we found induction of *NCED3* in the leaf tip while *NCED5* was induced in the petiole. Besides auxin,

135 gibberellin and ABA, we also observed transcriptional regulation of various genes involved in the  
 136 biosynthesis of BR, ethylene and other hormones (Figure S2B).  
 137 To get a better insight in abaxial-adaxial transcript differences, we next identified genes that show  
 138 differential response to FRtip between the two sides at 100 to 300 minutes of treatment (Figure 2).  
 139 There were no genes with opposite regulation between the two sides but we did observe  
 140 consistently stronger transcript regulation in the abaxial compared to the adaxial side of the petiole  
 141 for both up- and downregulated DEGs (Figure 2A). The FRtip-upregulated genes in this subset  
 142 showed enrichment for biological processes related to auxin and growth as well as to gibberellin, BR  
 143 and ethylene (Figure 2B). As transcript regulation is strongest in the abaxial side of the petiole in this  
 144 comparison this suggests that these processes are preferentially activated abaxially. Among the  
 145 transcripts showing the highest significance in this analysis were many SAURs and other auxin-  
 146 induced genes as well as the gibberellin biosynthesis genes *GA20OX1* and *GA20OX2*. Abaxial-adaxial

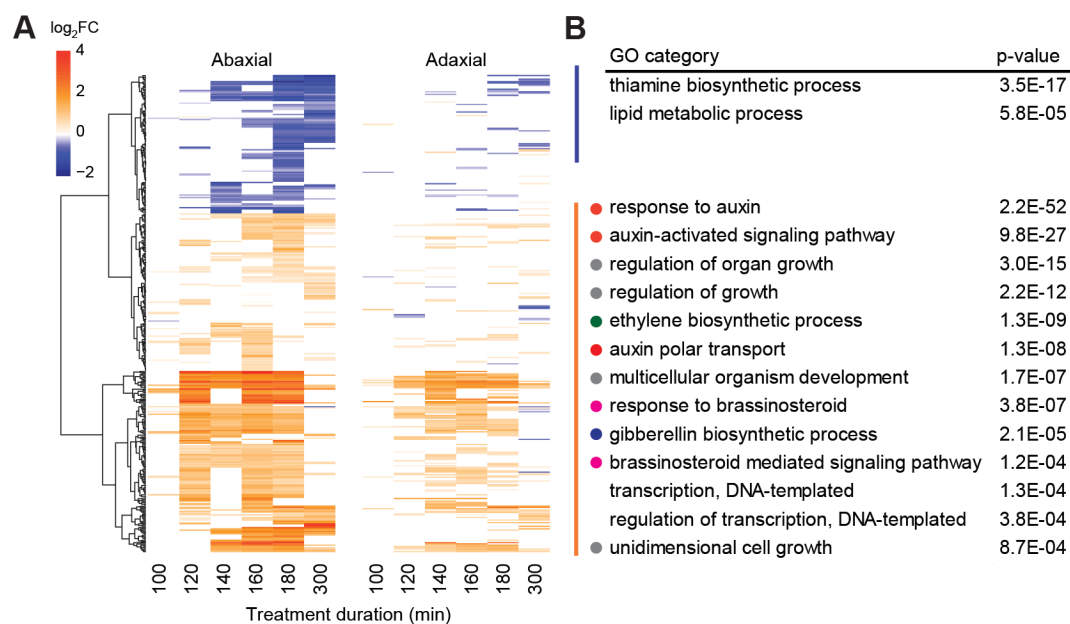

147

148 **Figure 2. Neighbour detection at the leaf tip induces unique abaxial and adaxial transcriptomes**

149 (A) Clustered heatmap showing  $\log_2FC$  in FRtip compared to WL of genes that show a different FRtip response between the two sides of the  
 150 petiole at the indicated timepoints (ANOVA interaction tissue\*treatment  $p < 0.001$ ). (B) Separate GO analysis based on the clusters of  
 151 upregulated (orange - red) and downregulated (blue) genes identified in (A). Coloured circles represent the following defined major  
 152 biological processes; red – auxin distribution and signalling; grey – cell and organ growth; green – ethylene biosynthesis; magenta –  
 153 brassinosteroid signalling; blue – gibberellin biosynthesis.

154 transcriptional differences were also found in WL, and included many genes associated with  
155 photosynthesis.

### 156 **Neighbour detection in the leaf tip leads to directed auxin transport towards the abaxial petiole**

157 The enrichment for FRtip-induced auxin signalling in the transcriptome data prompted us to quantify  
158 free levels of the auxin indole-3-acetic acid (IAA) in the three leaf sections. We found increased IAA  
159 concentrations in the leaf tip and the abaxial petiole, but not in the adaxial petiole (Figure 3A) upon  
160 exposure of the leaf tip to FR. To study whether such differential auxin concentrations are required  
161 for petiole hyponasty, we exogenously applied IAA to the abaxial or adaxial petiole (Figure 3B). We  
162 found that abaxial IAA application results in strong hyponasty regardless of R/FR, while adaxial IAA  
163 application inhibited the hyponastic response to FRtip. These observations indicate that an auxin  
164 gradient, either installed endogenously or through directional external application, is necessary for  
165 leaf movement.

166 To achieve further spatiotemporal resolution of auxin distribution, we visualised auxin distribution  
167 using the R2D2 part of the newly constructed C3PO fluorescent auxin reporter. C3PO conveniently  
168 combines the previously described R2D2 reporter for auxin concentration and the DR5v2 reporter  
169 that reports auxin response<sup>19</sup> into a single construct (*DR5v2::n3mTurquoise2-*  
170 *pRPS5A::mD2::ntdTomato-pRPS5A::D2::n3Venus*) (Figure S3). We developed a method to image  
171 transverse cross-sections of fixated and cleared petiole material in which we could measure  
172 fluorescence in individual cells and cell layers (Figures 3C and S3H). We found that the auxin  
173 concentration, as reported by the mD2/D2 (R2D2) intensity ratio, increased in all cell layers on the  
174 abaxial side within 3 hours of FRtip and remained higher than WL throughout the 7 hour interval that  
175 we measured, while there was little increase on the adaxial side (Figures 3D and 3E). When  
176 substituting FRtip with local IAA application on the leaf tip (IAAtip) we found increased R2D2 ratios  
177 after three hours in both sides of the petiole. At later timepoints of IAAtip treatment, the adaxial  
178 increase was lost and even changed into decreased R2D2 ratios in the adaxial endodermis and

179 cortex, whereas the abaxial tissues continued to have an elevated R2D2 ratio, indicating elevated  
180 auxin levels.

### 181 **Auxin accumulation in the abaxial petiole via PINs**

182 The petiole hyponasty response to FRtip requires intact auxin transport and is, therefore, reduced in  
183 the *pin3* single mutant and absent in the *pin3 pin4 pin7* triple mutant<sup>10,11</sup>. Similarly, *pin3* and *pin3*  
184 *pin4 pin7* mutants respectively showed reduced and absent hyponasty in response to auxin  
185 application to the leaf tip (Figure S4A). When we analysed auxin distribution using the R2D2 ratio  
186 from C3PO crossed to the *pin3 pin4 pin7* mutant background we found that these mutations  
187 inhibited FRtip and IAAtip-induced abaxial R2D2 ratio increases (Figures 3F and 3G). The R2D2 ratio in  
188 WL was also different from wild type in *pin3 pin4 pin7* with a relatively increased R2D2 ratio in the  
189 inner cell layers and a reduced R2D2 ratio in the abaxial outer cortex and epidermis in *pin3 pin4 pin7*  
190 compared to wild type. We observed similar differences from wild type when regarding the auxin  
191 response, visualised by DR5v2::mTurquoise2 (Figures S4B and S4C), implying that perturbed PIN  
192 function prevents auxin transport towards the outermost cell layers in the petiole. In contrast with  
193 the induction of the R2D2 ratio by FRtip and IAAtip in C3PO, we did not find clear induction of  
194 DR5v2::mTurquoise2 intensity (Figures S4B and S4C). The lack of DR5v2 inducibility by IAAtip and  
195 FRtip likely indicates a poor sensitivity of this reporter in the petiole since our transcriptome analysis  
196 shows pronounced induction of auxin response upon FRtip (Figure 1), and only very large changes,  
197 such as following from the *pin3 pin4 pin7* triple mutant, affect the DR5V2 signal in petiole tissue.

198 Given the prominent effect of *pin* mutations on hyponasty (Figure S4A) and reported abaxial auxin  
199 accumulation in response to IAAtip and FRtip (Figure 3G), and the established regulation of PIN3  
200 localization by supplemental FR in seedlings<sup>20</sup> we studied PIN3 localisation and abundance in  
201 petioles using *pPIN3::PIN3-GFP*. We found that in the petiole endodermis, PIN3-GFP is significantly



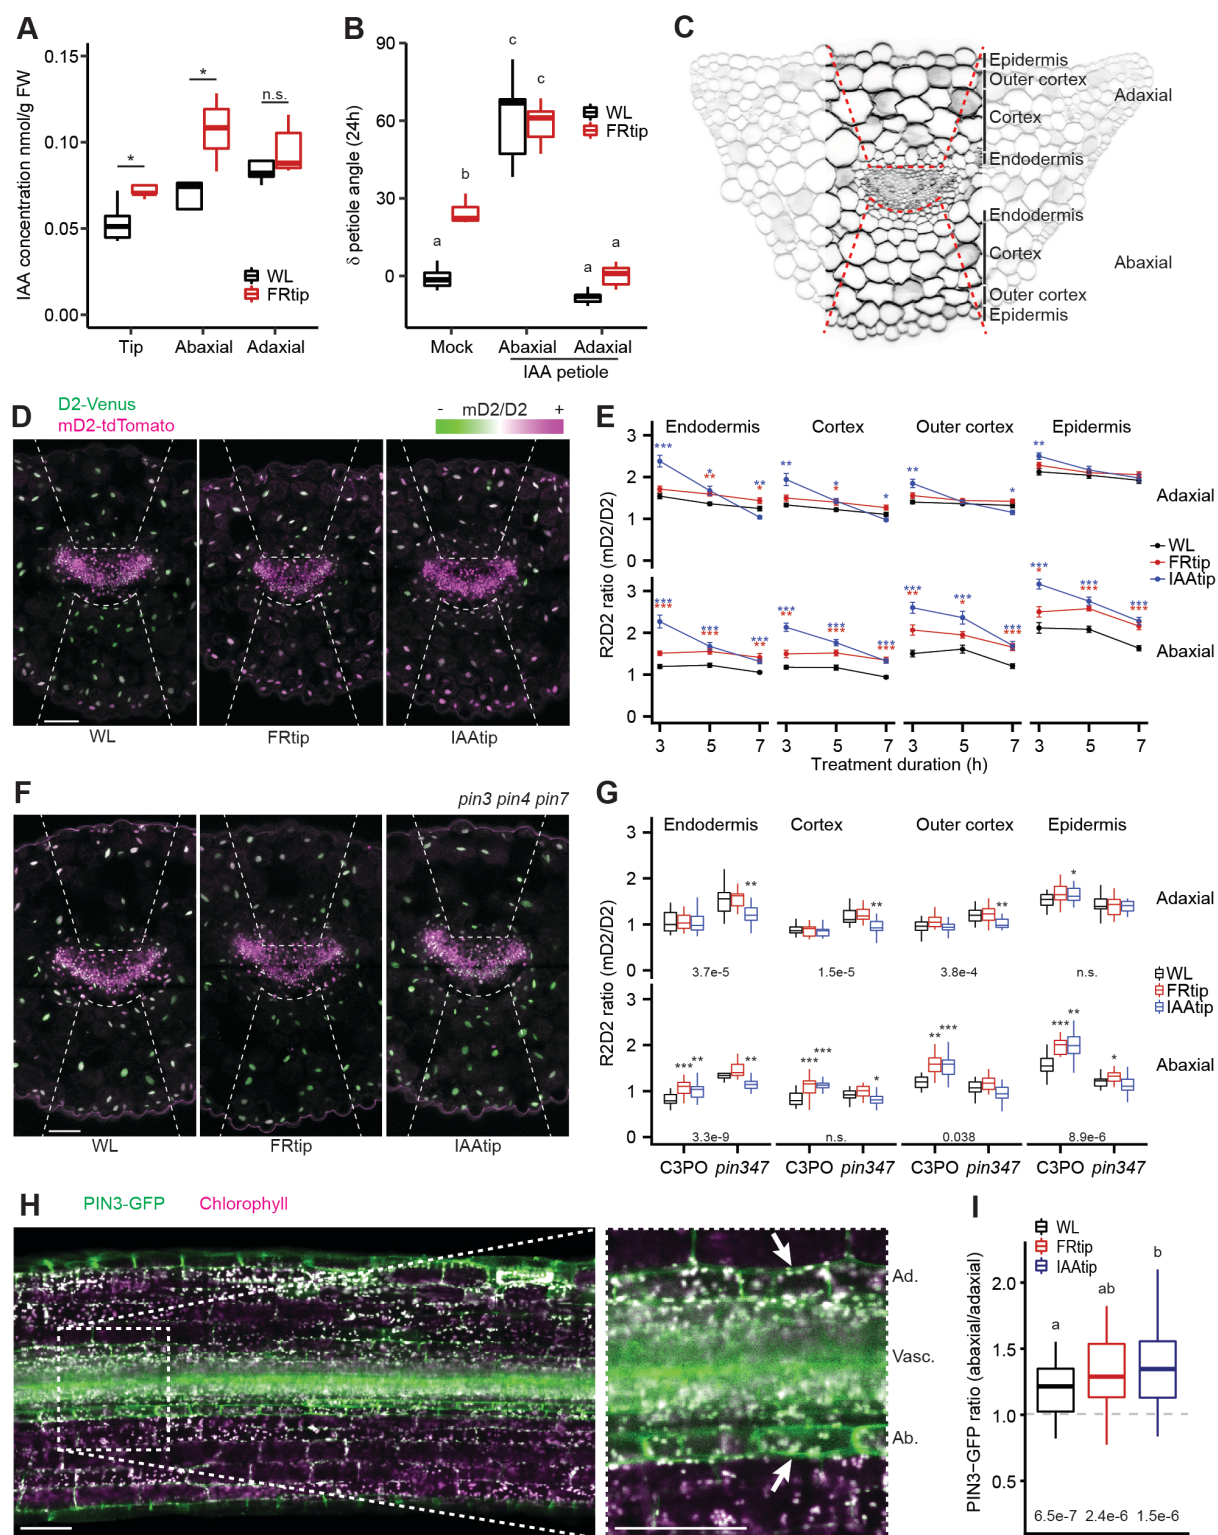

202

203

**Figure 3. Leaf tip-derived auxin is directed towards the abaxial petiole via PIN transporters**

204

(A) Free IAA concentration (nmol/g FW) in the leaf tip and abaxial/adaxial split petiole after 5h light treatment. (n = 5 biological replicates

205

from 20 plants each, \*: p < 0.05, two-sided t-test). (B) Petiole angle change after 24h light treatment combined with 30 μM IAA or mock

206

application to the petiole. (n = 7, different letters indicate significant differences, Tukey HSD p < 0.05). (C) Petiole base cross-section

207

indicating cell layers and region of the petiole that was used to quantify fluorescence in D – G and other figures. (D & E) Representative

208

images after 5 h (D) and quantification at indicated timepoints (E) of the R2D2 ratio in the petiole base of C3PO. Plants were treated with

209

mock, FRtip or IAAtip. (n = > 11, coloured asterisks represent significant treatment effect compared to WL, \*: p < 0.05, \*\*: p < 0.01,

210 **Figure 3 continued**

211 \*\*\*:  $p < 0.001$ , two-sided t-test, data represent mean  $\pm$  SEM). (F & G) Representative images of *pin3 pin4 pin7* C3PO (F) and quantification  
212 of the R2D2 ratio in C3PO and *pin3 pin4 pin7* C3PO (*pin347*) (G) in the petiole base. Plants were treated for 7h with mock, FRtip or IAAtip. (n  
213 = > 15, asterisks indicate significant treatment effect compared to WL, \*:  $p < 0.05$ , \*\*:  $p < 0.01$ , \*\*\*:  $p < 0.001$ , two-sided t-test. Inset values  
214 represent p-value for genotype difference in WL calculated per cell layer, two-sided t-test). (H) Representative overview image and closeup  
215 around the vasculature of *pPIN3::PIN3-GFP* in a longitudinal petiole cross-section. Ad. : Adaxial endodermis, Vasc. : vasculature, Ab.:  
216 Abaxial endodermis. Arrows indicate the endodermal cells in which PIN3-GFP intensity in the membranes was quantified for I. (I) Ratio of  
217 PIN3-GFP intensity in the abaxial/adaxial endodermis after 2.5-4h in WL, FRtip or IAAtip. (n = 46 - WL, 28 - FRtip, 30 - IAAtip, different  
218 letters indicate significant differences, Tukey HSD  $p < 0.05$ ). Inset values represent p-value for difference from ratio 1, one-sample t-tests.  
219 Scale bars in microscopy images represent 100  $\mu$ m, dashed lines in D and F indicate the abaxial and adaxial regions where nuclear  
220 fluorescence was quantified. See also Figures S3 and S4.

221

222 enriched on the abaxial side compared to the adaxial side and that this asymmetry is reinforced in  
223 IAAtip treatment (Figures 3H and 3I). Taken together, this implies that PIN-dependent auxin  
224 transport directs tip-derived auxin to the abaxial petiole to stimulate abaxial cell elongation and  
225 petiole hyponasty upon neighbour detection in the leaf tip.

226 **Auxin activates members of the BAP/D module in the abaxial petiole for petiole hyponasty**

227 Upon arrival in target tissue, auxin can stimulate growth by activating target gene expression via  
228 AUXIN RESPONSE FACTOR (ARF) transcription factors<sup>21</sup>. Mutant phenotyping revealed that higher  
229 order mutant combinations of *ARF6*, *ARF7* (*NON-PHOTOTROPIC HYPOCOTYL 4*, *NPH4*) and *ARF8*,  
230 which were previously described to collectively regulate hypocotyl elongation responses<sup>22</sup>, reduce  
231 the hyponastic response to tip-derived auxin (Figure 4A). ARF6 is one of the members of the BAP/D  
232 module, in which the transcription factors BZR1, ARF6 and PIF4 stimulate cell growth by reinforcing  
233 each other's activity while all being repressed by DELLAs<sup>23</sup>. PIF4, PIF5 and PIF7 together regulate FR-  
234 induced hyponasty<sup>11</sup> and mutation of *PIF4* and *PIF5* also reduced the petiole hyponasty response to  
235 IAAtip (Figure 4B). Loss of PIF7, in wild type or *pif4 pif5* background, however had little to no effect  
236 on the responsiveness to IAAtip. We observed a similar pattern when we applied IAA directly to the  
237 abaxial petiole (Figure 4C), confirming that the auxin response, and not auxin transport, is reduced in  
238 *pif4 pif5*, whereas *pif7* has a wild-type auxin response. Combined with our previous observation that  
239 FR-induced expression of *YUCCA* in the leaf tip is PIF7-dependent<sup>11</sup>, we conclude that PIF7 is

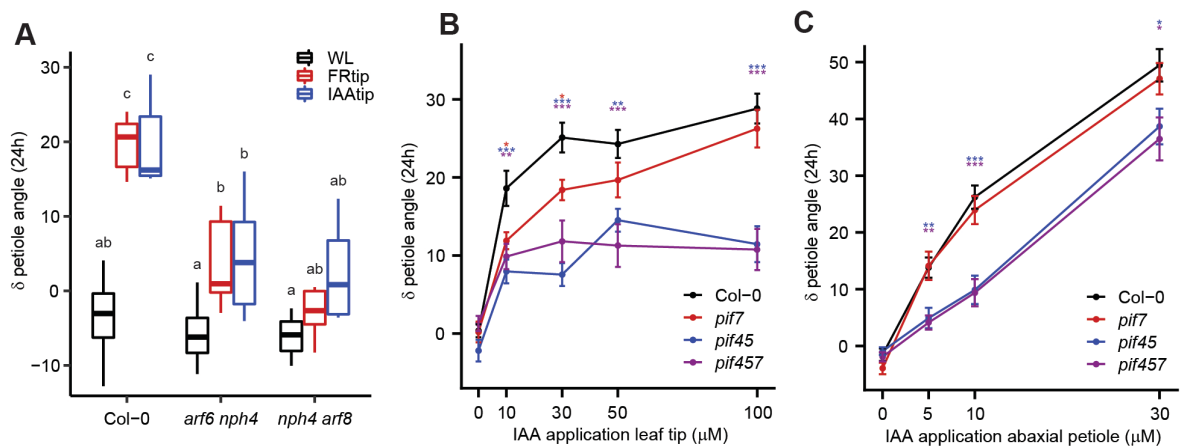

240  
 241 **Figure 4. Leaf tip-derived auxin stimulates petiole hyponasty through activation of PIFs and ARFs**  
 242 (A) Petiole angle change after 24h WL, FRtip or IAAtip treatment in Col-0, *arf6 nph4* and *nph4 arf8*. (n = 7, different letters indicate  
 243 significant differences, Tukey HSD p < 0.05). (B & C) Petiole angle change after 24h in Col-0, *pif7*, *pif4 pif5* (*pif45*) and *pif4 pif5 pif7* (*pif457*)  
 244 treated with different concentrations of IAA or mock to the leaf tip (B) and abaxial petiole (C). (n = 14, coloured asterisks represent  
 245 significant genotype effect compared to Col-0, \*: p < 0.05, \*\*: p < 0.01, \*\*\*: p < 0.001, two-sided t-test, data represent mean  $\pm$  SEM).

246  
 247 required for YUCCA-mediated auxin biosynthesis in the leaf tip, while PIF4 and PIF5 promote the  
 248 auxin response in the petiole, probably as components of the BAP/D module.

#### 249 Gibberellin as a downstream target of auxin signalling

250 The growth-repressing members of the BAP/D module, the DELLA proteins, are degraded through  
 251 gibberellin signalling<sup>24</sup>. In addition to the auxin enrichment profiles, our transcriptome analysis  
 252 shows a strong enrichment for gibberellin biosynthesis and signalling, specifically in the abaxial  
 253 petiole (Figures 1F and 2), where expression of *GA20OX1* and *GA20OX2* was induced (Figure S2B).  
 254 This seems to be a response to tip-derived auxin as similar asymmetric induction of *GA20OX2* was  
 255 found in response to IAAtip (Figure 5A).

256 Mutant analysis revealed that single *ga20ox1* and *ga20ox2* mutants showed reduced hyponastic  
 257 responses to FRtip, and the *ga20ox1 ga20ox2* double mutant lacked all petiole hyponasty (Figure 5B).  
 258 When we applied GA to the petiole the hyponastic response to FRtip was restored in *ga20ox1*  
 259 *ga20ox2* (Figure 5C). Consistent with the mutant data, paclobutrazol (PAC) pre-treatment, which  
 260 blocks gibberellin biosynthesis, also inhibited the hyponastic response to FRtip and this could also be



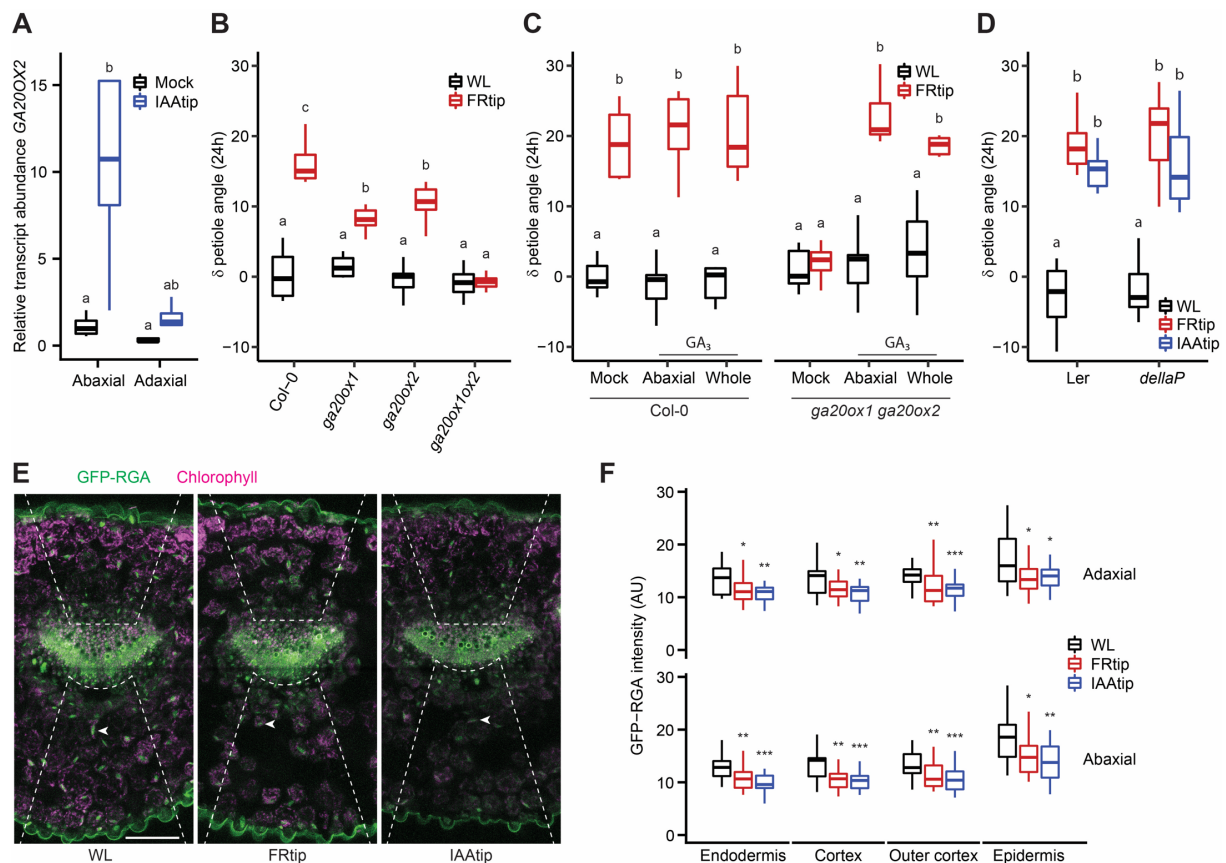

261

262 **Figure 5. Gibberellin signalling facilitates the petiole hyponasty response to leaf tip-derived auxin**

263 (A) Relative *GA20OX2* transcript abundance in the abaxial and adaxial petiole after 2h mock and IAAtip treatments. Relative transcript  
 264 abundance compared to the abaxial petiole in mock treatment. (n = 4 biological replicates from 8 plants each, different letters indicate  
 265 significant differences, Tukey HSD  $p < 0.05$ ). (B) Petiole angle change after 24h light treatment in Col-0, *ga20ox1*, *ga20ox2* and *ga20ox1*  
 266 *ga20ox2* (*ga20ox1ox2*). (n = 9, different letters indicate significant differences, Tukey HSD  $p < 0.05$ ). (C) Petiole angle change after 24h light  
 267 treatment combined with 50  $\mu\text{M}$   $\text{GA}_3$  or mock application to the abaxial or whole petiole in Col-0 and *ga20ox1 ga20ox2*. (n = 7, different  
 268 letters indicate significant differences, Tukey HSD  $p < 0.05$ ). (D) Petiole angle change after 24h WL, FRtip or IAAtip treatment in *Ler* and  
 269 *dellaP*. (n = 7, different letters indicate significant differences, Tukey HSD  $p < 0.05$ ). (E & F) Representative images (E) and quantification (F)  
 270 of GFP-RGA fluorescence in the petiole base. Plants were treated for 7h with mock, FRtip or IAAtip. (> 20, asterisks represent significant  
 271 treatment effect compared to WL, \*:  $p < 0.05$ , \*\*:  $p < 0.01$ , \*\*\*:  $p < 0.001$ , two-sided t-test). Scale bar in E represents 100  $\mu\text{m}$ , dashed lines  
 272 indicate the abaxial and adaxial regions where nuclear GFP signal was quantified, arrowheads point out an individual nucleus in the abaxial  
 273 cortex in each image. See also Figure S5 and Table S1.

274

275 rescued by exogenous GA application to the petiole (Figure S5A). In addition, we observed petiole

276 hyponasty when we applied GA to the leaf tip in both wild type and *ga20ox1 ga20ox2* without

277 additional FR (Figure S5B). Next, we tested the global (pentuple) DELLA knockout mutant *dellaP*.

278 Although leaf angles were constitutively high in *dellaP*, FRtip and IAAtip still induced further petiole

279 hyponasty, resulting in nearly vertical leaves (Figures 5D and S5C). When we studied DELLA

280 abundance using the DELLA reporter *pRGA::GFP-RGA* that has been previously shown be GA-sensitive

281 under low R:FR treatments, we observed clear RGA degradation in both sides of the petiole upon  
282 FRtip and IAAtip (Figures 5E and 5F). These data together indicate that leaf tip-derived auxin induces  
283 the expression of *GA200X* gibberellin synthesis genes in the petiole, presumably leading to increased  
284 gibberellin levels. Indeed, leaf-tip derived auxin results in DELLA protein degradation in the petiole  
285 and the hyponastic response is gibberellin-dependent.

286

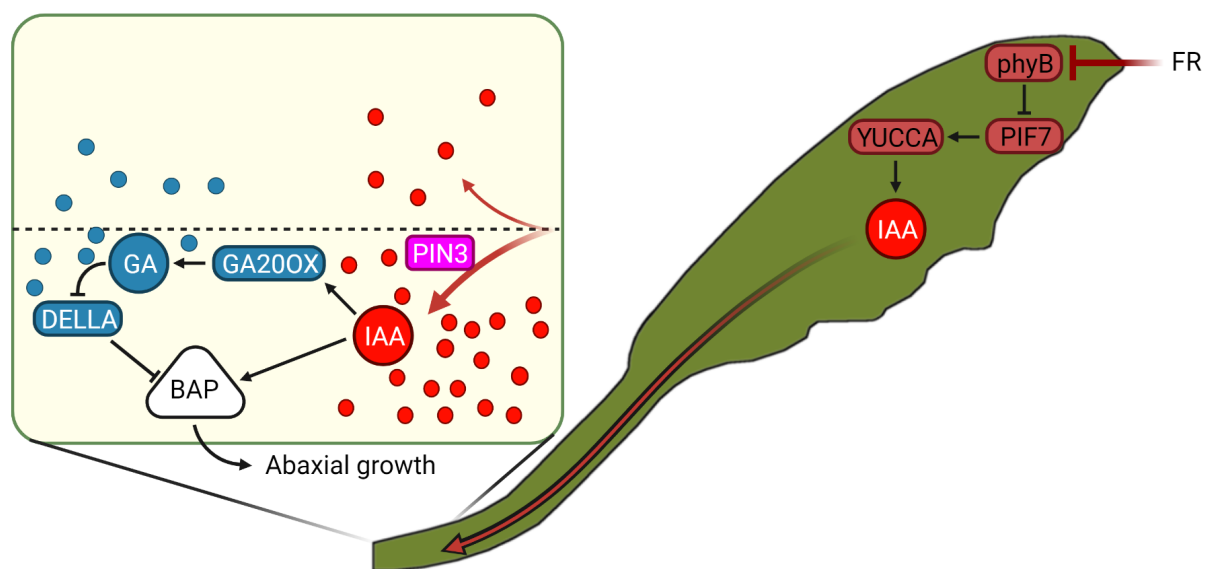

287

288 **Figure 6. Proposed mechanism of how long-distance phytochrome signalling from tip to base orchestrates petiole hyponasty**

289 FR light reflected from neighbours is first detected at the outermost leaf tip. This induces local inactivation of phyB, followed by auxin  
290 synthesis via PIF7 and YUCCAs, of which gene expression is induced within 40 minutes of FRtip. Auxin is transported from the leaf tip to the  
291 petiole and directed towards the abaxial petiole by PINs. In the abaxial petiole, leaf tip-derived auxin likely stimulates gibberellin synthesis  
292 via *GA200X* expression, leading to the breakdown of DELLAs in the petiole. DELLA inactivation would then release repression of the auxin-  
293 activated growth-promoting BAP module. The asymmetric auxin distribution and signalling ensures that cell growth is limited to the abaxial  
294 petiole which results in adaptive petiole hyponasty. Round shapes represent auxin (IAA, red) and gibberellin (GA, blue).

295

## 296 Discussion

297 In this work, we show that plants use directional auxin transport from the leaf tip towards the abaxial  
298 petiole to initiate petiole hyponasty upon neighbour detection in the leaf tip. Using transcriptome  
299 analysis we reveal that phytochrome signalling of far-red light in the leaf tip induces a rapid auxin

300 response in the abaxial petiole, that also stimulates expression of *GA20OX* gibberellin biosynthesis  
301 genes (Figures 1, 2 and S3).

302 The directed auxin transport towards the abaxial petiole requires functional PIN auxin efflux proteins  
303 (Figures 3F, 3G and S4), including PIN3. We show that in the petiole endodermis PIN3 is more  
304 abundant on the abaxial than the adaxial side and that this PIN3 asymmetry is enhanced in response  
305 to auxin application at the leaf tip (Figures 3H and 3I). The PIN3 asymmetry likely directs tip-derived  
306 auxin flow from the vasculature towards the abaxial petiole, thereby stimulating asymmetric cell  
307 growth and hyponasty (Figure 6). PIN4 and PIN7 localisation dynamics may also contribute to the  
308 directional auxin flow, potentially in other cell layers, as occurs in roots<sup>25</sup>, but this was not  
309 investigated here. Endodermal PIN3 redistribution also occurs during FR light-induced hypocotyl  
310 elongation and during phototropism<sup>20,26</sup>. Moreover, the petiole hyponastic response to elevated  
311 temperatures also involves PIN3 accumulation in the abaxial endodermis<sup>27</sup>. However, these  
312 previously published examples involve direct light or temperature treatment exposure of the tissues  
313 where PIN3 redistributes. Our observation that remote IAA<sub>tip</sub> triggers similar endodermal PIN3  
314 redistribution in the distal petiole, which is not exposed to treatment, implies that auxin itself  
315 reinforces the endodermal PIN3 asymmetry such that auxin is predominantly directed towards the  
316 abaxial side of the petiole. In support of this hypothesis, Keuskamp *et al.*, 2010 showed that the FR-  
317 induced changes in PIN3 abundance and localisation in elongating hypocotyls relied on signalling of  
318 auxin itself. Possibly, the basic levels of auxin biosynthesis under control conditions suffice to create  
319 a basal level of PIN3 asymmetry in the petiole that is enlarged by additional FR-induced auxin  
320 biosynthesis. Other putative factors that could contribute to the abaxial-adaxial PIN3 asymmetry  
321 include signalling via leaf-polarity factors<sup>27-29</sup>, asymmetric leaf and vasculature structure (Figure 3C),  
322 gravity<sup>30</sup> and even a light signalling gradient within the tissue<sup>31</sup>.

323 Upregulation of *GA20OX* expression during shade and auxin-induced growth was previously shown  
324<sup>32,33</sup>. However, it was not known that these genes are also responsive to remote FR or auxin

325 signalling. We observed that tip-derived auxin stimulates gibberellin biosynthesis by inducing  
326 *GA20OX1* and *GA20OX2* expression in the growing abaxial petiole and that as a result, the DELLA  
327 protein RGA is degraded (Figures 5A, 5E, 5F and S2B). In high gibberellin conditions, DELLA  
328 degradation prevents their inhibition of various growth-promoting transcription factors, including  
329 PIFs<sup>34,35</sup>. In contrast to the specifically abaxial auxin accumulation and *GA20OX* expression, RGA  
330 degradation occurred non-specifically on both sides of the petiole (Figures 5E and 5F), suggesting  
331 abaxial-adaxial gibberellin transport that would result in non-differential gibberellin signalling in the  
332 petiole in response to FRtip. When we applied GA to both sides of the petiole in the gibberellin-  
333 deficient *ga20ox1 ga20ox2* mutant, we found that the hyponastic response to FRtip was rescued in a  
334 similar manner compared to when GA was applied only to the abaxial side and that GA application to  
335 the petiole in WL did not affect petiole angles (Figure 5C). We therefore propose that gibberellin  
336 abundance and subsequent DELLA degradation in the petiole are required to allow for petiole cell  
337 growth, while abaxial auxin accumulation provides the directional cue that ensures differential  
338 petiole growth that results in adaptive petiole hyponasty (Figure 6).

339 In contrast with *GA20OX1* and *GA20OX2*, a third member of the family *GA20OX3* was strongly  
340 induced specifically in the leaf tip by FRtip treatment. Our proposed mechanism for auxin-induced  
341 gibberellin biosynthesis in the petiole in a *GA20OX1* and *GA20OX2*-dependent manner, does not  
342 exclude the possibility that gibberellin derived from the leaf tip would also be transported towards  
343 the petiole to enhance petiole hyponasty. Indeed, when we applied GA to the leaf tip in WL, this  
344 resulted in petiole hyponasty in both wild type and *ga20ox1 ga20ox2* (Figure S5B). Keeping in mind  
345 that GA treatment of the petiole does not stimulate petiole hyponasty in WL (Figure 5C), we  
346 hypothesise that GA treatment of the leaf tip may locally degrade DELLAs, leading to enhanced PIF  
347 activity and auxin biosynthesis in the leaf tip. As *ga20ox1 ga20ox2* requires GA supplementation to  
348 the petiole to show petiole hyponasty in FRtip (Figure 5C), this suggests that exogenous GA to the  
349 leaf tip would also be transported towards the petiole. Combined tip-to-base transport of GA and  
350 auxin would then allow for hyponasty in *ga20ox1 ga20ox2*.

351 Besides their role in auxin biosynthesis, we showed that PIF4 and PIF5 are also required for the  
352 downstream petiole growth response to tip-derived auxin (Figures 4B and 4C). In addition, we found  
353 functional requirement for ARF6, ARF7 and ARF8 for petiole hyponasty, and transcriptional activation  
354 of BR signalling in the petiole (Figures 1F, 2 and 4A). This indicates that activation of members of the  
355 BAP/D module is involved in auxin-mediated petiole hyponasty (Figure 6). It remains to be studied  
356 whether the specific members and interactions in the BAP/D module are the same in adult petioles  
357 as in hypocotyls<sup>23</sup>.

358 Spatial separation of light signalling and shoot growth response has been studied in seedlings in the  
359 past<sup>16,17,36</sup>. However, the study system presented here provides an opportunity to study the effects  
360 of FR enrichment on distal, auxin-mediated growth without local light treatment of the responding  
361 organ. This will help further unravel the complex interactions between photoreceptors, the BAP/D  
362 module and other growth repressors and activators that plants use to optimize their growth to the  
363 environment<sup>37</sup>. We conclude that upon neighbour detection, plants use carefully controlled long-  
364 distance auxin transport from the leaf tip to the abaxial petiole base to adaptively raise their leaves  
365 in a process that requires gibberellin biosynthesis and activation of the BAP/D module.

366

## 367 **Acknowledgements**

368 We would like to thank all members of the Plant Ecophysiology research group at Utrecht University  
369 that participated in material harvests for RNA sequencing. We thank Kerstin Gühl for developing  
370 methods for IAA quantification and Yorrit van der Kaa for help propagating seed material. We also  
371 thank the Utrecht Sequencing Facility and the UMCU Bioinformatics Expertise Core for RNA  
372 sequencing and read annotation.

373 J.J.K. was supported by the Netherlands Organisation for Scientific Research (GSU 831.15.003), C.-Y.L.  
374 was supported by the European Research Council (ERC; StG “CELLPATTERN”; contract 281573 to  
375 D.W.), W.K. was supported by the Netherlands Organisation for Scientific Research (Veni

376 863.15.010), C.K.P. was supported by the Netherlands Organisation for Scientific Research (open  
377 competition ALWOP.509 to Kaisa Kajala), R.P. and L.O. were supported by the Netherlands  
378 Organisation for Scientific Research (Vici 865.17.002 to R.P.).

379

### 380 **Author contributions**

381 Conceptualization, J.J.K. and R.P.; Methodology, J.J.K., L.O., S.E.A.M., C.-Y.L. and W.K.; Software, J.J.K.  
382 and B.L.S.; Formal Analysis, J.J.K. and B.L.S.; Investigation, J.J.K., L.O., C.K.P., S.E.A.M., E.R., E.D.C.E.,  
383 H.W., C.-Y.L. and W.K.; Resources, C.-Y.L. and D.W.; Writing – Original Draft, J.J.K. and R.P.; Writing –  
384 Review & Editing, J.J.K. and R.P. with input from all authors; Visualization, J.J.K. and B.L.S.;  
385 Supervision, R.P.; Project Administration, R.P.; Funding Acquisition, J.J.K. and R.P.

386

### 387 **Declaration of interests**

388 The authors declare no competing interests.

389

### 390 **Materials and Methods**

#### 391 **Plant material and growth conditions**

392 Genotypes used in this study: *ga20ox1-3*<sup>38</sup>, *ga20ox2-1*<sup>38</sup>, *ga20ox1-3 ga20ox2-1*<sup>38</sup>, *arf6-2 nph4-1*<sup>22</sup>,  
393 *nph4-1 arf8-3*<sup>22</sup>, *pif4-101 pif5-1*<sup>39</sup>, *pif7-1*<sup>40</sup>, *pif4-101 pif5-1 pif7-1*<sup>41</sup>, *pin3-3*<sup>42</sup>, *pin3-3 pin4 pin7*<sup>43</sup>,  
394 *pin3-3 pPIN3::PIN3-GFP*<sup>44</sup>, C3PO and *pin3 pin4 pin7* C3PO were all in Col-0 background; *dellaP*<sup>34</sup> and  
395 *pRGA::GFP-RGA*<sup>45</sup> were in Ler background.

396 Seeds were sown on Primasta soil or agarose plates for germination and cold stratified for three days  
397 before transfer to short day white light (WL) conditions light/dark 9 h/15 h, 20 °C, 70 % humidity, 130-

398 150  $\mu\text{mol m}^{-2} \text{s}^{-1}$  PAR. Around eight days after germination, individual seedlings were transplanted to  
399 70 mL round pots containing Primasta soil.

400 For microscopic screening of C3PO fluorescence in the root, seeds were surface sterilized, sown on  
401 half-strength Murashige and Skoog medium with 0.8% Daichin agar (Duchefa) (1/2 MS plate) and  
402 vernalized at 4 °C for 2 d. Afterwards, the seedlings were grown in climate room conditions at 22 °C in  
403 16 h/8 h light/dark cycles.

#### 404 **Construction of the C3PO auxin reporter**

405 The C3PO construct (pGIIM/DR5v2::n3mTurquoise2-pRPS5A::mD2:ntdTomato-pRPS5A::D2:n3Venus)  
406 was generated via inserting DR5v2::n3mTurquoise2 into R2D2<sup>19</sup>. n3mTurquoise2 was generated by  
407 sequentially cloning the following three constructs, that were generated via PCR from plasmid  
408 template “pmTurquoise2-C1100”, into pGIK/LIC\_SwaI-LIC\_HpaIv2-tNOS: mTurquoise2 coding  
409 sequence (CDS) with a stop codon, mTurquoise2 CDS without stop codon and NLS: mTurquoise2  
410 without stop codon. The n3mTurquoise2-tNOS cassette was then excised via BamHI-XbaI double-  
411 digestion and inserted via conventional cloning into pGIK/DR5v2::ntdTomato-tNOS, after the  
412 ntdTomato-tNOS cassette had first been removed via BamHI-XbaI double-digestion, to generate  
413 pGIK/DR5v2::n3mTurquoise2-tNOS. An Ascl restriction site was inserted into XbaI-digested  
414 pGIK/DR5v2::n3mTurquoise2-tNOS via conventional cloning before ligating DR5v2::n3mTurquoise2-  
415 tNOS, that was excised by Bsp120I-Ascl double-digestion, with Bsp120I-Ascl double-digested  
416 pGIIM/pRPS5A::mD2:ntdTomato-pRPS5A::D2:n3Venus to generate pGIIM/DR5v2::n3mTurquoise2-  
417 pRPS5A::mD2:ntdTomato-pRPS5A::D2:n3Venus that we named C3PO. C3PO was then introduced  
418 into *Arabidopsis* via floral dip and selected using methotrexate. *pin3 pin4 pin7* C3PO was generated  
419 by crossing C3PO to *pin3-3 pin4 pin7*. Primer sequences used for cloning are shown in Table S1.

#### 420 **Light and pharmacological treatments**

421 For FRtip light treatment, WL was supplemented with FR using EPITEX L730-06AU FR LEDs. These FR  
422 LEDs had peak emission at 730 nm and locally reduced R/FR from ~2.0 in WL to below 0.1 in FRtip.



423 For pharmacological treatments at the leaf tip, 5  $\mu$ L solution was pipetted onto the leaf tip. Except  
424 for the IAA concentration series in Figures 4B and S4A, 30  $\mu$ M IAA was provided for IAA tip  
425 treatments. Pharmacological solutions and mocks for leaf tip application contained DMSO for IAA  
426 (0.03-0.1 %) or EtOH for GA<sub>3</sub> (0.05 %) as well as Tween-20 (0.1 %). For hormone application to the  
427 petiole, concentrated stocks were diluted in lanolin (95-97 % lanolin, 0.01-0.03 % DMSO for IAA, 0.05  
428 % EtOH for GA<sub>3</sub>). The lanolin containing solutions were carefully applied to the petiole using a tooth  
429 pick. When hormones were applied to one side of the petiole, a mock solution was applied to the  
430 other side. Paclobutrazol (PAC) treatment was done ten and five days before the experiment started.  
431 On both days, 20 mL 100  $\mu$ M PAC or mock (0.3 % EtOH) was provided to the soil of each individual  
432 pot.

433 For all experiments, 28 day old plants were selected based on homogeneous development and the  
434 presence of a ~5 mm petiole on the 5<sup>th</sup> youngest leaf which would be used in the experiment. All  
435 experiments were started at 10:00 (ZT2). For phenotyping experiments, petiole angle before  
436 treatment and after 24 hours was determined in ImageJ using side photos.

#### 437 **Epidermal imprints and cell size measurements**

438 Leaf material for epidermal imprints was harvested after 24 hours treatment. Dissected petioles  
439 were gently pressed into dental paste mixture (Coltene) to produce a leaf mold. After a few minutes  
440 of drying, a thin layer of transparent nail polish was applied onto the partially hardened dental paste  
441 before application of a second layer of dental paste on the adaxial side of the petiole. After  
442 solidification, the petiole sample was removed from the dental paste and a thin layer of transparent  
443 nail polish was brushed onto the imprint. The nail polish film was mounted on a microscopy slide and  
444 imaged at 40x magnification. Images were digitally stitched together and abaxial and adaxial cell  
445 lengths were measured along the petiole in ICY software (de Chaumont *et al.*, 2012). Data was  
446 smoothed using a rolling average combining cell length data from up to 5 x-axis positions,  
447 depending on whether neighbouring datapoints were available.



#### 448 **qRT-PCR and RNA-sequencing**

449 For gene expression experiments, leaf tip and petiole material was harvested and snap frozen in  
450 liquid nitrogen and stored at -80 °C until further processing. The number of plants per replicate and  
451 number of replicates used in qRT-PCR experiments are indicated in the figure legends. RNA for qRT-  
452 PCR was isolated using the Qiagen RNeasy kit with on-column DNase treatment. cDNA was  
453 synthesized using SuperScript III Reverse Transcriptase and random hexamer primers (Invitrogen).  
454 qRT-PCR was performed on the ViiA7 platform (Thermo Fisher) in 384-well plates using a 5 µL total  
455 volume containing SYBR Green (Bio-Rad). Transcript abundance was compared to housekeeping  
456 genes *PEX4* and *RHIP1* and made relative to the abundance in a designated control condition  
457 (indicated in figure legends). Primer sequences used for qRT-PCR are shown in Table S1. For RNA-  
458 sequencing, we harvested material from 13 leaves per sample, for a total of four biological replicates.  
459 Poly-A mRNA was isolated and used for the preparation of barcoded cDNA libraries according to the  
460 BrAD-seq protocol<sup>47</sup>. Libraries were sequenced on an Illumina NextSeq 500 platform at 1\*75bp read  
461 length yielding around 13 million reads per sample.

#### 462 **RNA-sequencing data analysis**

463 Reads were annotated to the TAIR10 genome and read counts were normalised using DESeq2<sup>18</sup>  
464 (<https://github.com/UMCUGenetics/RNASeq>,  
465 <https://github.com/UMCUGenetics/RNASeq#differential-expression-analysis>). Genes that had an  
466 average of less than 1 annotated read per sample were removed. For the remaining 19663 genes, we  
467 calculated the mean read count as well as log<sub>2</sub>FC and p-value between treatments. Treatment-  
468 induced differentially expressed genes (DEGs) were identified per timepoint and per tissue when  $p <$   
469  $0.01$  and  $\log_2FC > 0.3 / < -0.3$ . For Figure S2, a log<sub>2</sub>FC cut-off of  $> 1 / < -1$  was used. For Figure 2, we  
470 used an ANOVA approach to find genes with a significant ( $p < 0.001$ ) two-way interaction  
471 Treatment\*Tissue between the two petiole halves at timepoints 100 - 300 minutes. Principal  
472 coordinate analysis was performed on log<sub>2</sub> transformed relative transcript abundance. Gene

473 ontology (GO) enrichment analyses were performed using the hypergeometric test available in R. GO  
474 terms are only shown when highly significantly enriched in one sample ( $-\log_{10}(\text{q-value}) > 25$ ) or  
475 consistently significantly enriched in five or more samples ( $-\log_{10}(\text{q-value}) > 5$ ).

#### 476 **IAA extraction and quantification by liquid chromatography-tandem mass spectrometry**

477 For the extraction of IAA from *A. thaliana* petioles, ~40 mg of snap-frozen leaf material was used per  
478 sample. Tissue was ground to a fine powder at  $-80^{\circ}\text{C}$  using 3-mm stainless steel beads at 50 Hz for  
479 2\*30 seconds in a TissueLyser LT (Qiagen, Germantown, USA). Ground samples were extracted with 1  
480 mL of cold methanol containing [phenyl  $^{13}\text{C}_6$ ]-IAA (0.1 nmol/mL) as an internal standard as  
481 previously described<sup>48</sup>. Samples were filtered through a 0.45  $\mu\text{m}$  Minisart SRP4 filter (Sartorius,  
482 Goettingen, Germany) and measured on the same day. IAA was analyzed on a Waters Xevo TQs  
483 tandem quadruple mass spectrometer as previously described<sup>49,50</sup>.

#### 484 **Confocal microscopy**

485 For confocal microscopy in transverse petiole cross-sections we harvested leaves into 24-well plates  
486 containing 4 % paraformaldehyde in PBS (pH 6.8) with Tween-20 (0.05 %). After vacuum incubation  
487 for one hour, leaves were washed three times for two minutes in PBS and stored for up to 24 h in  
488 PBS. Next, leaves were dried and placed in an Eppendorf tube containing warm agarose (3.5 %) and  
489 transferred to ice to solidify the agarose. Solid agarose plugs were sectioned to 250  $\mu\text{m}$  slices using a  
490 Leica VT1000S vibratome. The first two slices from the petiole base (~0-500  $\mu\text{m}$ ) were discarded, and  
491 the next two (~500-1000  $\mu\text{m}$ ) were moved to 24-well plates containing ClearSee medium<sup>51</sup> and  
492 incubated for at least 7 days before microscopy. For Figure 3C, after the initial clearing, ClearSee was  
493 supplemented with Calcofluor white (0.01 %, 5 h), and rinsed afterwards with ClearSee. Longitudinal  
494 cross-sections for PIN3-GFP were made by hand, without prior fixation or clearing. Samples were  
495 directly placed with the cut edge onto a coverslip container (Lab-Tek) and immediately imaged.  
496 Sample drying was prevented by adding wet filter paper around the sample and covering the  
497 combination with a coverslip.

498 Confocal microscopy was largely performed on a Zeiss LSM880 system using a 25x glycerol objective.  
499 For C3PO we used the following laser and filters; mTurquoise2 – 458 nm laser, 467-500 nm filter,  
500 Venus – 514 nm laser, 525-550 nm filter, tdTomato – 561 nm laser, 571-629 nm filter. For PIN3-GFP  
501 we used; GFP – 488 nm laser, 501-548 nm filter, chlorophyll – 561 nm laser, 651-704 nm filter. For  
502 GFP-RGA we used; GFP – 488 nm laser, 510-525 nm filter, chlorophyll – 561 nm laser, 641-691 nm  
503 filter. Z-stacks were generated and combined into maximum intensity projections for nuclear  
504 fluorescence intensity measurements in ICY software<sup>46</sup>. For PIN3-GFP, mean fluorescence intensity  
505 was measured in ICY on all sides of the visible endodermal cells in a single representative Z-layer. ICY  
506 was also used to select representative microscopy images and adjust brightness and contrast for  
507 improved clarity. Image adjustments were performed the same way between treatments.

508 For the development of C3PO, confocal microscopy on roots was performed on a Leica SP5II system  
509 using a 20x water-immersion objective with the following laser and filters; mTurquoise2 – 458 nm  
510 laser, 468-495 nm filter, Venus – 514 nm laser, 524-540 nm filter, tdTomato – 561 nm laser, 571-630  
511 nm filter.

## 512 **Statistical analyses and data visualisation**

513 Specific details on statistical analyses can be found in the figure legends. In multi-comparison  
514 analyses, we performed multi-factorial ANOVA with Tukey's HSD post hoc correction. Elsewhere, we  
515 used two-sided t-test with  $p < 0.05$  cut-off. Graphs and heatmaps were prepared in R and finetuned  
516 in Adobe Illustrator. The schematic model of signalling in Figure 6 was made in BioRender.

## 517 **Data availability**

518 The raw RNA sequencing data generated in this study will be made publicly available in the National  
519 Center for Biotechnology Information (NCBI) Gene Expression Omnibus (GEO) upon publication. All  
520 data and biological materials are available from the corresponding author upon request.

## 521 **Legends for supplemental video and dataset files**

522 **Video S1. Dynamics of FRtip-induced leaf movement, Related to Figures 1 and S1A**

523 Treatment duration in hours is indicated by the timer. Similar-sized leaves in the WL (left) and FRtip (right) treatments are indicated with an  
524 orange dot.

525

526 **References**

527

- 528 1. Huber, M., Nieuwendijk, N.M., Pantazopoulou, C.K., and Pierik, R. (2021). Light signalling shapes plant-  
529 plant interactions in dense canopies. *Plant Cell Environ.* *44*, 1014–1029.
- 530 2. Bou-Torrent, J., Roig-Villanova, I., and Martínez-García, J.F. (2008). Light signaling: back to space.  
531 *Trends Plant Sci.* *13*, 108–114.
- 532 3. Montgomery, B.L. (2016). Spatiotemporal Phytochrome Signaling during Photomorphogenesis : From  
533 Physiology to Molecular Mechanisms and Back. *Front. Plant Sci.* *7*, 1–8.
- 534 4. Küpers, J.J., van Gelderen, K., and Pierik, R. (2018). Location Matters: Canopy Light Responses over  
535 Spatial Scales. *Trends Plant Sci.* *23*, 865–873.
- 536 5. Fernández-Milmanda, G.L., and Ballaré, C.L. (2021). Shade Avoidance: Expanding the Color and  
537 Hormone Palette. *Trends Plant Sci.* *26*, 509–523.
- 538 6. Carriedo, L.G., Maloof, J.N., and Brady, S.M. (2016). Molecular control of crop shade avoidance. *Curr.*  
539 *Opin. Plant Biol.* *30*, 151–158.
- 540 7. Pantazopoulou, C.K., Bongers, F.J., and Pierik, R. (2021). Reducing shade avoidance can improve  
541 Arabidopsis canopy performance against competitors. *Plant Cell Environ.* *44*, 1130–1141.
- 542 8. Legris, M., Ince, Y.Ç., and Fankhauser, C. (2019). Molecular mechanisms underlying phytochrome-  
543 controlled morphogenesis in plants. *Nat. Commun.* *10*, 1–15.
- 544 9. Ballaré, C.L., Scopel, A.L., and Sánchez, R.A. (1990). Far-Red Radiation Reflected from Adjacent Leaves:  
545 An Early Signal of Competition in Plant Canopies. *Science (80- )*. *247*, 329–332.
- 546 10. Michaud, O., Fiorucci, A., Xenarios, I., and Fankhauser, C. (2017). Local auxin production underlies a  
547 spatially restricted neighbor-detection response in Arabidopsis. *Proc. Natl. Acad. Sci. U. S. A.* *114*, 7444–  
548 7449.
- 549 11. Pantazopoulou, C.K., Bongers, F.J., Küpers, J.J., Reinen, E., Das, D., Evers, J.B., Anten, N.P.R., and Pierik,  
550 R. (2017). Neighbor detection at the leaf tip adaptively regulates upward leaf movement through  
551 spatial auxin dynamics. *Proc. Natl. Acad. Sci. U. S. A.* *114*, 7450–7455.
- 552 12. Polko, J.K., van Zanten, M., van Rooij, J.A., Marée, A.F.M., Voeselek, L.A.C.J., Peeters, A.J.M., and Pierik,  
553 R. (2012). Ethylene-induced differential petiole growth in Arabidopsis thaliana involves local  
554 microtubule reorientation and cell expansion. *New Phytol.* *193*, 339–348.
- 555 13. Li, L., Ljung, K., Breton, G., Schmitz, R.J., Pruneda-Paz, J., Cowing-Zitron, C., Cole, B.J., Ivans, L.J.,  
556 Pedmale, U. V., Jung, H.-S., et al. (2012). Linking photoreceptor excitation to changes in plant  
557 architecture. *Genes Dev.* *26*, 785–790.
- 558 14. Hornitschek, P., Kohnen, M. V., Lorrain, S., Rougemont, J., Ljung, K., López-Vidriero, I., Franco-Zorrilla,  
559 J.M., Solano, R., Trevisan, M., Pradervand, S., et al. (2012). Phytochrome interacting factors 4 and 5  
560 control seedling growth in changing light conditions by directly controlling auxin signaling. *Plant J.* *71*,  
561 699–711.
- 562 15. Hersch, M., Lorrain, S., de Wit, M., Trevisan, M., Ljung, K., Bergmann, S., and Fankhauser, C. (2014).  
563 Light intensity modulates the regulatory network of the shade avoidance response in Arabidopsis. *Proc.*  
564 *Natl. Acad. Sci. U. S. A.* *111*, 6515–6520.
- 565 16. Procko, C., Crenshaw, C.M., Ljung, K., Noel, J.P., and Chory, J. (2014). Cotyledon-Generated Auxin Is  
566 Required for Shade-Induced Hypocotyl Growth in Brassica rapa. *Plant Physiol.* *165*, 1285–1301.
- 567 17. Kohnen, M. V, Schmid-Siegert, E., Trevisan, M., Allenbach Petrolati, L., Sénéchal, F., Müller-Moulé, P.,  
568 Maloof, J., Xenarios, I., and Fankhauser, C. (2016). Neighbor detection induces organ-specific  
569 transcriptomes, revealing patterns underlying hypocotyl-specific growth. *Plant Cell* *28*, 2889–2904.
- 570 18. Love, M.I., Huber, W., and Anders, S. (2014). Moderated estimation of fold change and dispersion for  
571 RNA-seq data with DESeq2. *Genome Biol.* *15*, 1–21.
- 572 19. Liao, C., Smet, W., Brunoud, G., Yoshida, S., Vernoux, T., and Weijers, D. (2015). Reporters for sensitive  
573 and quantitative measurement of auxin response. *Nat. Methods* *12*, 207–210.
- 574 20. Keuskamp, D.H., Pollmann, S., Voeselek, L.A.C.J., Peeters, A.J.M., and Pierik, R. (2010). Auxin transport  
575 through PIN-FORMED 3 (PIN3) controls shade avoidance and fitness during competition. *Proc. Natl.*  
576 *Acad. Sci. U. S. A.* *107*, 22740–22744.
- 577 21. Weijers, D., and Wagner, D. (2016). Transcriptional Responses to the Auxin Hormone. *Annu. Rev. Plant*

- 578 Biol. 67, 539–574.
- 579 22. Reed, J.W., Wu, M.F., Reeves, P.H., Hodgens, C., Yadav, V., Hayes, S., and Pierik, R. (2018). Three Auxin  
580 Response Factors Promote Hypocotyl Elongation. *Plant Physiol.* 178, 864–875.
- 581 23. Oh, E., Zhu, J.Y., Bai, M.Y., Arenhart, R.A., Sun, Y., and Wang, Z.Y. (2014). Cell elongation is regulated  
582 through a central circuit of interacting transcription factors in the *Arabidopsis* hypocotyl. *Elife* 3,  
583 e03031.
- 584 24. Sun, T. (2010). Gibberellin-GID1-DELLA: a pivotal regulatory module for plant growth and development.  
585 *Plant Physiol.* 154, 567–570.
- 586 25. Ruiz Rosquete, M., Barbez, E., and Kleine-Vehn, J. (2012). Cellular auxin homeostasis: Gatekeeping is  
587 housekeeping. *Mol. Plant* 5, 772–786.
- 588 26. Ding, Z., Galván-Ampudia, C.S., Demarsy, E., Łangowski, Ł., Kleine-Vehn, J., Fan, Y., Morita, M.T., Tasaka,  
589 M., Fankhauser, C., Offringa, R., et al. (2011). Light-mediated polarization of the PIN3 auxin transporter  
590 for the phototropic response in *Arabidopsis*. *Nat. Cell Biol.* 13, 447–452.
- 591 27. Park, Y.J., Lee, H.J., Gil, K.E., Kim, J.Y., Lee, J.H., Lee, H., Cho, H.T., Vu, L.D., Smet, I. De, and Park, C.M.  
592 (2019). Developmental programming of thermonastic leaf movement. *Plant Physiol.* 180, 1185–1197.
- 593 28. Merelo, P., Paredes, E.B., Heisler, M.G., and Wenkel, S. (2017). The shady side of leaf development: the  
594 role of the REVOLUTA/KANADI1 module in leaf patterning and auxin-mediated growth promotion. *Curr.*  
595 *Opin. Plant Biol.* 35, 111–116.
- 596 29. Bou-torrent, J., Salla-martret, M., Brandt, R., Musielak, T., Palauqui, J., Martínez-garcía, J.F., and  
597 Wenkel, S. (2012). ATHB4 and HAT3, two class II HD-ZIP transcription factors, control leaf  
598 development in *Arabidopsis*. *Plant Signal. Behav.* 7, 1382–1387.
- 599 30. Rakusová, H., Gallego-Bartolome, J., Vanstraelen, M., Robert, H.S., Alabadí, D., Blázquez, M.A.,  
600 Benková, E., and Friml, J. (2011). Polarization of PIN3-dependent auxin transport for hypocotyl  
601 gravitropic response in *Arabidopsis thaliana*. *Plant J.* 67, 817–826.
- 602 31. Legris, M., Szarzynska-Erden, B.M., Trevisan, M., Allenbach Petrolati, L., and Fankhauser, C. (2021).  
603 Phototropin-mediated perception of light direction in leaves regulates blade flattening. *Plant Physiol.*  
604 187, 1235–1249.
- 605 32. Hisamatsu, T., King, R.W., Helliwell, C.A., and Koshioka, M. (2005). The involvement of gibberellin 20-  
606 oxidase genes in phytochrome-regulated petiole elongation of *Arabidopsis*. *Plant Physiol.* 138, 1106–  
607 1116.
- 608 33. Frigerio, M., Alabadí, D., Pérez-Gómez, J., García-Cárcel, L., Phillips, A.L., Hedden, P., and Blázquez, M.A.  
609 (2006). Transcriptional regulation of gibberellin metabolism genes by auxin signaling in *Arabidopsis*.  
610 *Plant Physiol.* 142, 553–563.
- 611 34. Feng, S., Martinez, C., Gusmaroli, G., Wang, Y., Zhou, J., Wang, F., Chen, L., Yu, L., Iglesias-Pedraz, J.M.,  
612 Kircher, S., et al. (2008). Coordinated regulation of *Arabidopsis thaliana* development by light and  
613 gibberellins. *Nature* 451, 475–479.
- 614 35. de Lucas, M., Davière, J.-M., Rodríguez-Falcón, M., Pontin, M., Iglesias-Pedraz, J.M., Lorrain, S.,  
615 Fankhauser, C., Blázquez, M.A., Titarenko, E., and Prat, S. (2008). A molecular framework for light and  
616 gibberellin control of cell elongation. *Nature* 451, 480–484.
- 617 36. Das, D., St Onge, K.R., Voesenek, L.A.C.J., Pierik, R., and Sasidharan, R. (2016). Ethylene- and shade-  
618 induced hypocotyl elongation share transcriptome patterns and functional regulators. *Plant Physiol.*  
619 172, 718–733.
- 620 37. Küpers, J.J., Oskam, L., and Pierik, R. (2020). Photoreceptors regulate plant developmental plasticity  
621 through auxin. *Plants* 9, 940.
- 622 38. Rieu, I., Ruiz-Rivero, O., Fernandez-Garcia, N., Griffiths, J., Powers, S.J., Gong, F., Linhartova, T.,  
623 Eriksson, S., Nilsson, O., Thomas, S.G., et al. (2008). The gibberellin biosynthetic genes AtGA20ox1 and  
624 AtGA20ox2 act, partially redundantly, to promote growth and development throughout the *Arabidopsis*  
625 life cycle. *Plant J.* 53, 488–504.
- 626 39. Lorrain, S., Allen, T., Duek, P.D., Whitelam, G.C., and Fankhauser, C. (2008). Phytochrome-mediated  
627 inhibition of shade avoidance involves degradation of growth-promoting bHLH transcription factors.  
628 *Plant J.* 53, 312–23.
- 629 40. Leivar, P., Monte, E., Al-Sady, B., Carle, C., Storer, A., Alonso, J.M., Ecker, J.R., and Quail, P.H. (2008).  
630 The *Arabidopsis* phytochrome-interacting factor PIF7, together with PIF3 and PIF4, regulates responses  
631 to prolonged red light by modulating phyB levels. *Plant Cell* 20, 337–352.
- 632 41. de Wit, M., Ljung, K., and Fankhauser, C. (2015). Contrasting growth responses in lamina and petiole  
633 during neighbor detection depend on differential auxin responsiveness rather than different auxin  
634 levels. *New Phytol.* 208, 198–209.

- 635 42. Friml, J., Wisniewska, J., Benkova, E., Mendgen, K., and Palme, K. (2002). Lateral relocation of auxin  
636 efflux regulator PIN3 mediates tropism in Arabidopsis. *Nature* *415*, 806–809.
- 637 43. Willige, B.C., Ahlers, S., Zourelidou, M., Barbosa, I.C.R., Demarsy, E., Trevisan, M., Davis, P.A.,  
638 Roelfsema, M.R.G., Hangarter, R., Fankhauser, C., et al. (2013). D6PK AGCVIII kinases are required for  
639 auxin transport and phototropic hypocotyl bending in Arabidopsis. *Plant Cell* *25*, 1674–1688.
- 640 44. Žádníková, P., Petrášek, J., Marhavý, P., Raz, V., Vandenbussche, F., Ding, Z., Schwarzerová, K., Morita,  
641 M.T., Tasaka, M., Hejatko, J., et al. (2010). Role of PIN-mediated auxin efflux in apical hook  
642 development of Arabidopsis thaliana. *Development* *137*, 607–617.
- 643 45. Silverstone, A.L., Jung, H.S., Dill, A., Kawaide, H., Kamiya, Y., and Sun, T.P. (2001). Repressing a  
644 Repressor: Gibberellin-Induced Rapid Reduction of the RGA Protein in Arabidopsis. *Plant Cell* *13*, 1555–  
645 1565.
- 646 46. de Chaumont, F., Dallongeville, S., Chenouard, N., Hervé, N., Pop, S., Provoost, T., Meas-Yedid, V.,  
647 Pankajakshan, P., Lecomte, T., Le Montagner, Y., et al. (2012). Icy: An open bioimage informatics  
648 platform for extended reproducible research. *Nat. Methods* *9*, 690–696.
- 649 47. Townsley, B.T., Covington, M.F., Ichihashi, Y., Zumstein, K., and Sinha, N.R. (2015). BrAD-seq: Breath  
650 Adapter Directional sequencing: A streamlined, ultra-simple and fast library preparation protocol for  
651 strand specific mRNA library construction. *Front. Plant Sci.* *6*, 366.
- 652 48. Schiessl, K., Lilley, J.L.S., Lee, T., Tamvakis, I., Kohlen, W., Bailey, P.C., Thomas, A., Luptak, J.,  
653 Ramakrishnan, K., Carpenter, M.D., et al. (2019). NODULE INCEPTION Recruits the Lateral Root  
654 Developmental Program for Symbiotic Nodule Organogenesis in *Medicago truncatula*. *Curr. Biol.* *29*,  
655 3657–3668.
- 656 49. Ruyter-Spira, C., Kohlen, W., Charnikhova, T., van Zeijl, A., van Bezouwen, L., de Ruijter, N., Cardoso, C.,  
657 Lopez-Raez, J.A., Matusova, R., Bours, R., et al. (2011). Physiological effects of the synthetic  
658 strigolactone analog GR24 on root system architecture in arabidopsis: Another belowground role for  
659 strigolactones? *Plant Physiol.* *155*, 721–734.
- 660 50. Gühl, K., Holmer, R., Xiao, T.T., Shen, D., Wardhani, T.A.K., Geurts, R., van Zeijl, A., and Kohlen, W.  
661 (2021). The Effect of Exogenous Nitrate on LCO Signalling, Cytokinin Accumulation, and Nodule  
662 Initiation in *Medicago truncatula*. *Genes (Basel)*. *12*, 988.
- 663 51. Kurihara, D., Mizuta, Y., Sato, Y., and Higashiyama, T. (2015). ClearSee: a rapid optical clearing reagent  
664 for whole-plant fluorescence imaging. *Development* *142*, 4168–4179.
- 665
